# Supplementary material for: A core outcome set for damage control laparotomy via modified Delphi method
Source: HighWire-hosted journal article supplement (doi:10.1136/tsaco-2021-000821), 2022-01-01
Supplement: tsaco-2021-000821supp001_data_supplement.pdf [file tsaco-2021-000821supp001_data_supplement.pdf]

**Researchers (n=20)**

|                         |                                                                                                            |
|-------------------------|------------------------------------------------------------------------------------------------------------|
| Dr. Miklosh Bala        | Hadassah Hebrew University Medical Center<br>Jerusalem, Israel                                             |
| Dr. Andrew Bernard      | University of Kentucky<br>Kentucky, United States                                                          |
| Dr. Scott Brackenridge  | University of Florida<br>Gainesville, FL, United States                                                    |
| Dr. Karim Brohi         | Centre for Trauma Services, Queen Mary University of London<br>London, UK                                  |
| Dr. Bryan Collier       | Carillion Clinic<br>Roanoke, VA United States                                                              |
| Dr. Clay Cothren Burlew | Denver Health Medical Center<br>Denver, CO United States                                                   |
| Dr. Michael Cripps      | Ernest E Moore Shock Trauma Center at Denver Health<br>Denver, CO United States                            |
| Dr. Bruce Crookes       | Medical University of South Carolina<br>United States                                                      |
| Dr. Jose Diaz           | University of Maryland Medical Center<br>Baltimore, MA United States                                       |
| Dr. Juan Duchesne       | Tulane University Health Center<br>Louisiana, United States                                                |
| Dr. John Harvin         | McGovern Medical School at University of Texas Health Science Center Houston<br>Houston, TX, United States |
| Dr. Kenji Inaba         | Keck Hospital of University of Southern California<br>Los Angeles, CA, United States                       |
| Dr. Rao Ivatury         | Virginia Commonwealth University<br>Richmond, VA, United States                                            |
| Dr. Kevin Kasten        | Carolinas Medical Center<br>Charlotte, NC, United States                                                   |
| Dr. Jeffrey D. Kerby    | University of Alabama at Birmingham<br>Birmingham, AL, United States                                       |
| Dr. Margaret Lauerma    | University of Maryland Medical Center<br>Baltimore, MA United States                                       |
| Dr. Tyler Loftus        | University of Florida<br>Gainesville, FL, United States                                                    |
| Dr. Preston Miller      | Wake Forest School of Medicine<br>Winston-Salem, NC                                                        |

Dr. Thomas Scalea                      University of Maryland Medical Center  
Baltimore, MA United States

Dr Deborah Stein                        University of California, San Francisco  
San Francisco, CA, United States
